# Supplementary material for: A Social Media–Based Intervention for Chinese American Caregivers of Persons With Dementia: Protocol Development
Source: PubMed Central journal article supplement (PMC9562087; doi:10.2196/40171), 2022-09-29
Supplement: aging_v5i3e40171_app1.pdf [file aging_v5i3e40171_app1.pdf]

## Multimedia Appendix 1

Table S1: WECARE Program Schedule

| <b>Week 1: Program overview and introduction</b> |                                                                                                                        |
|--------------------------------------------------|------------------------------------------------------------------------------------------------------------------------|
| 1.1                                              | Introduction of WECARE                                                                                                 |
| 1.2                                              | What is AD? What's dementia? What are the symptoms, causes, and treatment                                              |
| 1.3                                              | How to provide care for AD patients in different stages?                                                               |
| 1.4                                              | How to seek medical help as a CP or caregiver?                                                                         |
| 1.5                                              | The roles of caregiver                                                                                                 |
| 1.6                                              | Week 1 summary: What's ADRD and what does it mean to be a caregiver?                                                   |
| <b>Week 2: Caring for ADRD patients</b>          |                                                                                                                        |
| 2.1                                              | How to transfer CP and prevent injuries?                                                                               |
| 2.2                                              | How to care for CP's oral health?                                                                                      |
| 2.3                                              | How to help CP bath and dress?                                                                                         |
| 2.4                                              | How to help CP use toilet?                                                                                             |
| 2.5                                              | How to care for diet and sleep for CP?                                                                                 |
| 2.6                                              | How to manage medication for CP?                                                                                       |
| <b>First group meeting</b>                       |                                                                                                                        |
| <b>Week 3: Effective communication</b>           |                                                                                                                        |
| 3.1                                              | What's effective communication?                                                                                        |
| 3.2                                              | How to communicate with the patient?                                                                                   |
| 3.3                                              | How to communicate with family members?                                                                                |
| 3.4                                              | How to communicate with children                                                                                       |
| 3.5                                              | How to communicate with friends and seek help?                                                                         |
| 3.6                                              | Week 3 Summary: Communication as a strategy to minimize conflict, identify a solution, and collaborate for a solution. |
| <b>Week 4: Problem solving in caregiving</b>     |                                                                                                                        |
| 4.1                                              | What's Problem Solving?                                                                                                |
| 4.2                                              | Problem solving example 1: How to deal with repetitive behaviors of CP?                                                |

|                                                           |                                                                                                      |
|-----------------------------------------------------------|------------------------------------------------------------------------------------------------------|
| 4.3                                                       | Problem solving example 2: How to deal with CP's aggressive behaviors?                               |
| 4.4                                                       | Problem solving example 3: When other family members don't take their share of responsibility for CP |
| 4.5                                                       | Problem solving example 4: CP doesn't want to take medicine                                          |
| 4.6                                                       | Week 4 summary: General rules in dealing with difficult behaviors                                    |
| <b>Second group meeting</b>                               |                                                                                                      |
| <b>Week 5: Stress reduction and depression prevention</b> |                                                                                                      |
| 5.1                                                       | What's stress? What are the signs you are stressed (emotional & physical)?                           |
| 5.2                                                       | How to deal with stress?                                                                             |
| 5.3                                                       | How to deal with negative emotion?                                                                   |
| 5.4                                                       | How to prevent depression?                                                                           |
| 5.5                                                       | Mindfulness as an approach to manage stress and negative emotions                                    |
| 5.6                                                       | Week 5 summary: Manage your emotional health and mental health                                       |
| <b>Week 6: Becoming a healthy caregiver</b>               |                                                                                                      |
| 6.1                                                       | Caregivers' self-care needs                                                                          |
| 6.2                                                       | Nutrition to stay healthy                                                                            |
| 6.3                                                       | Regular exercise to stay healthy                                                                     |
| 6.4                                                       | How to sleep well                                                                                    |
| 6.5                                                       | Learn to relax and rest well                                                                         |
| 6.6                                                       | Week 6 summary: Importance of self-care                                                              |
| <b>Third group meeting</b>                                |                                                                                                      |
| <b>Week 7: Course summary</b>                             |                                                                                                      |
| 7.1                                                       | Summary of how to take care of CP, including difficult behaviors (Weeks 1-2)                         |
| 7.2                                                       | Summary of how to communicate effectively and Problem-Solving mindset and skills (Weeks 3-4)         |
| 7.3                                                       | Summary of self-care: Caregivers' mental and physical health (Weeks 5-6)                             |
| 7.4                                                       | Plan the future: make plans for every day, making end-of-life decisions                              |
| 7.5                                                       | Week 7 summary and list of local resources                                                           |

CP=care partner, AD=Alzheimer's disease
